# Supplementary material for: Gold Nanoparticles Affect Pericyte Biology and Capillary Tube Formation
Source: MDPI journal article supplement (doi:10.3390/pharmaceutics13050738), 2021-05-17
Supplement: s1 [file s1]

## Supplementary Information: Gold Nanoparticles Affect Pericyte Biology and Capillary Tube Formation

Sasikarn Looprasertkul, Amornpun Sereemasapun, Nakarin Kitkumthorn, Kanidta Sooklert, Tewarit Sarachana and Depicha Jindatip

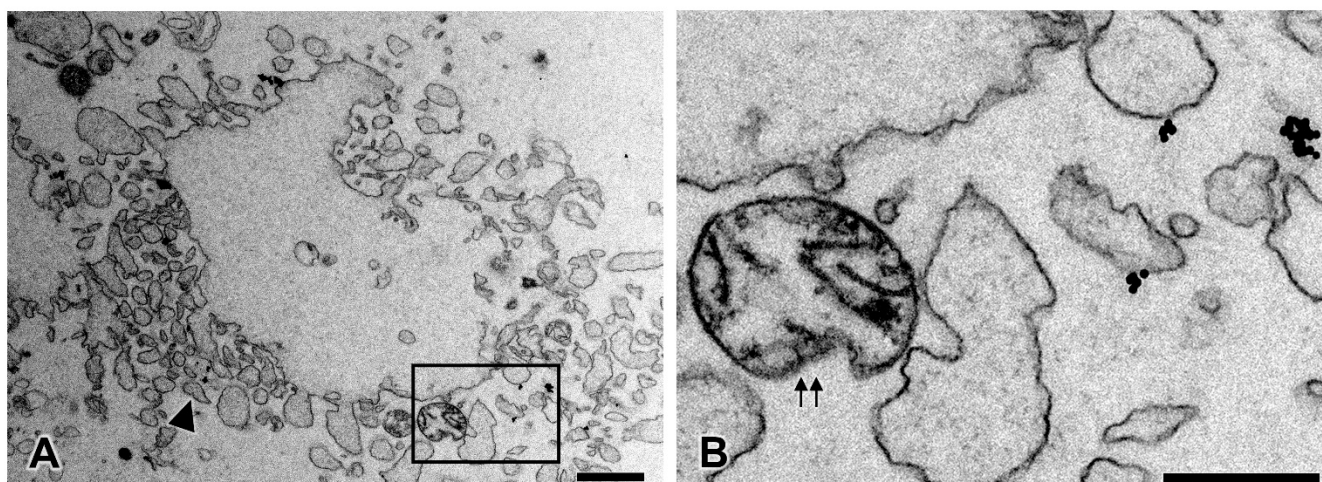

**Figure S1.** Transmission electron microscopy of the 50 ppm AuNP-treated pericyte group. A magnified view of the boxed area in **A** is shown in **B**. Some of the pericytes presented damaged plasma membranes, plasmalemmal blebs (*arrowhead*), swollen or damaged mitochondria (*double black arrows*) and free AuNPs (*electron-dense dots*) (**B**). Bars: 5000 nm (**A**), 1000 nm (**B**).

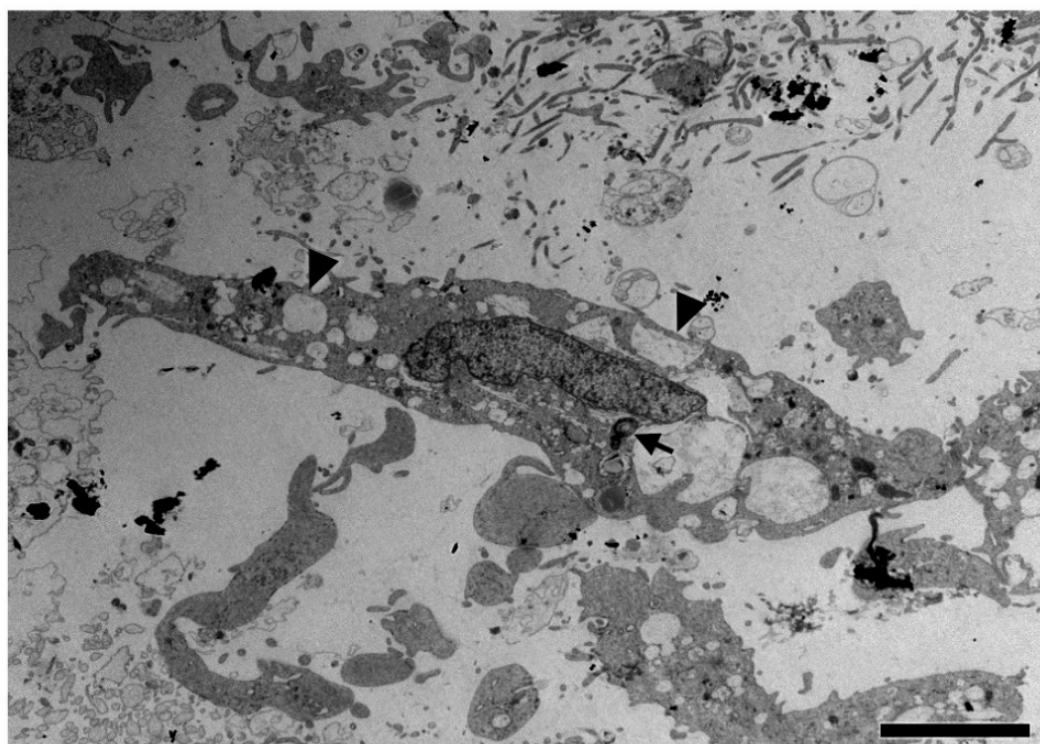

**Figure S2.** Transmission electron microscopy of the 50 AuNP ppm-treated pericyte group. Some of the pericytes presented continuous plasma membranes, numerous autophagic vesicles (*arrowhead*), and multilamellar whorl bodies (*black arrow*). Bar: 5000 nm.
